# Supplementary material for: Flash photolytic generation of two keto tautomers of 1-naphthol in aqueous solution: kinetics and equilibria of enolization
Source: Royal Society of Chemistry journal article supplement (doi:10.1039/c0pp00034e), 2010-04-09
Supplement: c0pp00034e.pdf [file c0pp00034e.pdf]

# Flash photolytic generation of two keto tautomers of 1-naphthol in aqueous solution; kinetics and equilibria of enolization

Ivo Glynné Gut, Lukas C. Scheibler, and Jakob Wirz\*

## 5 Electronic Supplementary Information

Table S1. Enolisation rates of benzo[*b*]cyclohexa-2,5-dien-1-one (5)

| $-\log[\text{H}^+]$ | $k^E/\text{s}^{-1}$ <sup>a)</sup> | conditions                       |
|---------------------|-----------------------------------|----------------------------------|
| 1.75                | $1.56 \pm 0.02$                   | HCl                              |
| 2.00                | $1.04 \pm 0.02$                   | HCl                              |
| 2.25                | $0.64 \pm 0.01$                   | HCl                              |
| 2.50                | $0.43 \pm 0.01$                   | HCl                              |
| 4.5                 | $0.19 \pm 0.01$                   | HAc/NaAc                         |
| 5.00                | $0.19 \pm 0.01$                   | HAc/NaAc                         |
| 5.50                | $0.18 \pm 0.01$                   | HAc/NaAc                         |
| 6.00                | $0.17 \pm 0.01$                   | HAc/NaAc                         |
| 8.25                | $0.22 \pm 0.01$                   | HTris/Tris                       |
| 11.50               | $23.4 \pm 0.2$                    | 0.005 M KOH (pH measured 11.40)  |
| 11.50               | $29.0 \pm 0.13$                   | 0.005 M NaOH (pH measured 11.60) |
| 11.80               | $52.7 \pm 0.4$                    | 0.01 M KOH (pH measured 11.79)   |
| 11.80               | $60.8 \pm 0.5$                    | 0.01 M NaOH (pH measured 11.90)  |
| 12.50               | $290 \pm 3$                       | 0.05 M KOH (pH measured 12.49)   |
| 12.50               | $235 \pm 3$                       | 0.05 M NaOH (pH measured 12.57)  |
| 12.80               | $594 \pm 12$                      | 0.10 M KOH (pH measured 12.90)   |
| 12.80               | $520 \pm 22$                      | 0.10 M NaOH (pH measured 12.91)  |

<sup>a)</sup> Error ranges are standard errors of the mean value determined by at least 10 experiments.

Table S2. Enolisation rates of benzo[*b*]cyclohexa-2,4-dien-1-one (4)

| $-\log[\text{H}^+]$ | $k^E/\text{s}^{-1}$ <sup>a)</sup> | conditions   |
|---------------------|-----------------------------------|--------------|
| 3.00                | $8.18 \pm 0.30$                   | 0.001 M HCl  |
| 2.70                | $8.61 \pm 0.16$                   | 0.002 M HCl  |
| 2.52                | $8.95 \pm 0.15$                   | 0.003 M HCl  |
| 2.40                | $9.19 \pm 0.17$                   | 0.004 M HCl  |
| 2.30                | $9.72 \pm 0.29$                   | 0.005 M HCl  |
| 2.22                | $10.1 \pm 0.22$                   | 0.006 M HCl  |
| 2.15                | $10.5 \pm 0.22$                   | 0.007 M HCl  |
| 2.10                | $10.8 \pm 0.21$                   | 0.008 M HCl  |
| 2.05                | $11.0 \pm 0.23$                   | 0.009 M HCl  |
| 2.00                | $11.3 \pm 0.48$                   | 0.010 M HCl  |
| 1.70                | $15.2 \pm 0.25$                   | 0.020 M HCl  |
| 1.52                | $18.6 \pm 0.53$                   | 0.030 M HCl  |
| 1.40                | $23.0 \pm 1.2$                    | 0.040 M HCl  |
| 1.30                | $24.8 \pm 1.3$                    | 0.050 M HCl  |
| 1.00                | $43.3 \pm 3.4$                    | 0.100 M HCl  |
| 10.80               | $61.1 \pm 1.6$                    | 0.001 M NaOH |
| 11.10               | $121 \pm 10$                      | 0.002 M NaOH |
| 11.28               | $182 \pm 11$                      | 0.003 M NaOH |
| 11.40               | $243 \pm 11$                      | 0.004 M NaOH |
| 11.50               | $307 \pm 48$                      | 0.005 M NaOH |

<sup>a)</sup> Error ranges are standard errors of the mean value determined by at least 10 experiments.
